# Supplementary material for: Grid–double-helicate interconversion
Source: Royal Society of Chemistry journal article supplement (doi:10.1039/c3cc38580a), 2013-01-01
Supplement: c3cc38580a.pdf [file c3cc38580a.pdf]

Electronic supplementary information  
(ESI)  
for the paper

**Grid—double-helicate interconversion**

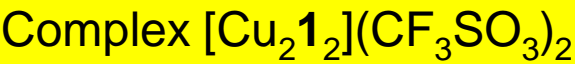

**Synthesis.** The solution of complex  $[\text{Cu}_2\mathbf{1}_2](\text{CF}_3\text{SO}_3)_2$  was obtained by mixing a suspension made of ligand **1** (2.11 mg, 0.005 mmol) and 0.5 mL of  $\text{CD}_3\text{NO}_2$  with 1 equivalent of  $\text{Cu}(\text{CD}_3\text{CN})_4\text{CF}_3\text{SO}_3$  contained in 45  $\mu\text{L}$  of  $\text{CD}_3\text{CN}$  solution. The solution was red.

The solution of  $\text{Cu}(\text{CD}_3\text{CN})_4\text{CF}_3\text{SO}_3$  was prepared by reaction of  $\text{Cu}(\text{CF}_3\text{SO}_3)_2$  (100 mg, 0.277 mmol) with an excess (3 equivalents) of Cu powder in  $\text{CD}_3\text{CN}$  (2 mL) at 40-45°C overnight, under stirring in a screw-cap vial (the final solution was colorless). See also: J. Irangu, M. J. Ferguson and R. B. Jordan, *Inorg. Chem.*, 2005, **44**, 1619-1625. After cooling, the suspension was filtered and the filtrate was collected in a 5 mL volumetric flask. The unreacted Cu and the filter were washed 5 times with 0.5 mL of  $\text{CD}_3\text{CN}$  that was also collected in the volumetric flask. Then, the solution from the flask was brought to the final volume of 5 mL with  $\text{CD}_3\text{CN}$ . Its concentration was determined by gravimetric analysis (precipitation of  $\text{Cu}^{\text{I}}$  as  $\text{CuSCN}$ ); one equivalent of  $\text{Cu}(\text{MeCN})_4\text{CF}_3\text{SO}_3$  that corresponds to 2.11 mg ligand **1** is contained in 45  $\mu\text{L}$  solution.

**$^1\text{H}$  NMR** (400 MHz,  $\text{CD}_3\text{NO}_2/\text{CD}_3\text{CN}$  10/0.9 v/v; reference  $\text{CHD}_2\text{NO}_2$  peak,  $\delta_{\text{ref}} = 4.34$  ppm): 8.35 (s, 4H,  $\text{H}_{\text{E}}$ ), 8.31-8.25 (m, 4H,  $\text{H}_{\text{H}}$ ), 7.97-7.87 (m, 8H,  $\text{H}_{\text{A}}+\text{H}_{\text{C}}$ ), 7.87-7.80 (m, 4H,  $\text{H}_{\text{D}}$ ), 7.63-7.53 (m, 6H,  $\text{H}_{\text{I}}+\text{H}_{\text{J}}$ ), 7.08 (s, 2H,  $\text{H}_{\text{G}}$ ), 7.07-7.02 (m, 4H,  $\text{H}_{\text{B}}$ ), 3.75 (s, 12H,  $\text{H}_{\text{F}}$ ) ppm.

**$^{13}\text{C}$  NMR** (100 MHz,  $\text{CD}_3\text{NO}_2/\text{CD}_3\text{CN}$  10/0.9; reference  $\text{CD}_3\text{NO}_2$  peak,  $\delta_{\text{ref}} = 62.9$  ppm): 164.1, 162.9, 152.4, 150.6, 140.2, 140.0, 138.8, 132.4, 129.9, 129.5, 127.4, 126.6, 93.7, 33.2 ppm.

**HR-ESI-MS**,  $m/z$ :  $[\text{Cu}_2\mathbf{1}_2\text{CF}_3\text{SO}_3]^+ = \text{C}_{49}\text{H}_{44}\text{Cu}_2\text{F}_3\text{N}_{16}\text{O}_3\text{S}^+$ , found 1121.208 (100%), calcd. 1121.203 (the sample for ESI-MS was prepared using  $\text{CH}_3\text{NO}_2$  as a solvent).

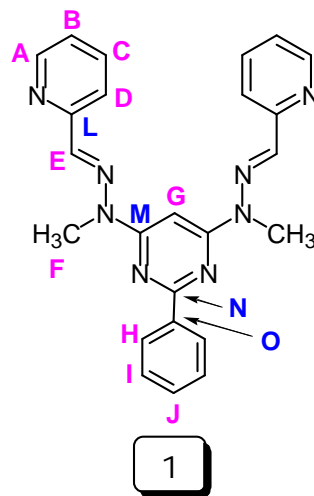

**Figure S1.** ROESY spectrum of complex  $[\text{Cu}_2\mathbf{1}_2](\text{CF}_3\text{SO}_3)_2$  (400 MHz, solvent  $\text{CD}_3\text{NO}_2/\text{CD}_3\text{CN}$  10/0.9 v/v;  $^1\text{H}$ - $^1\text{H}$  interactions corresponding to key cross peaks are shown on the structural formula of the complex).

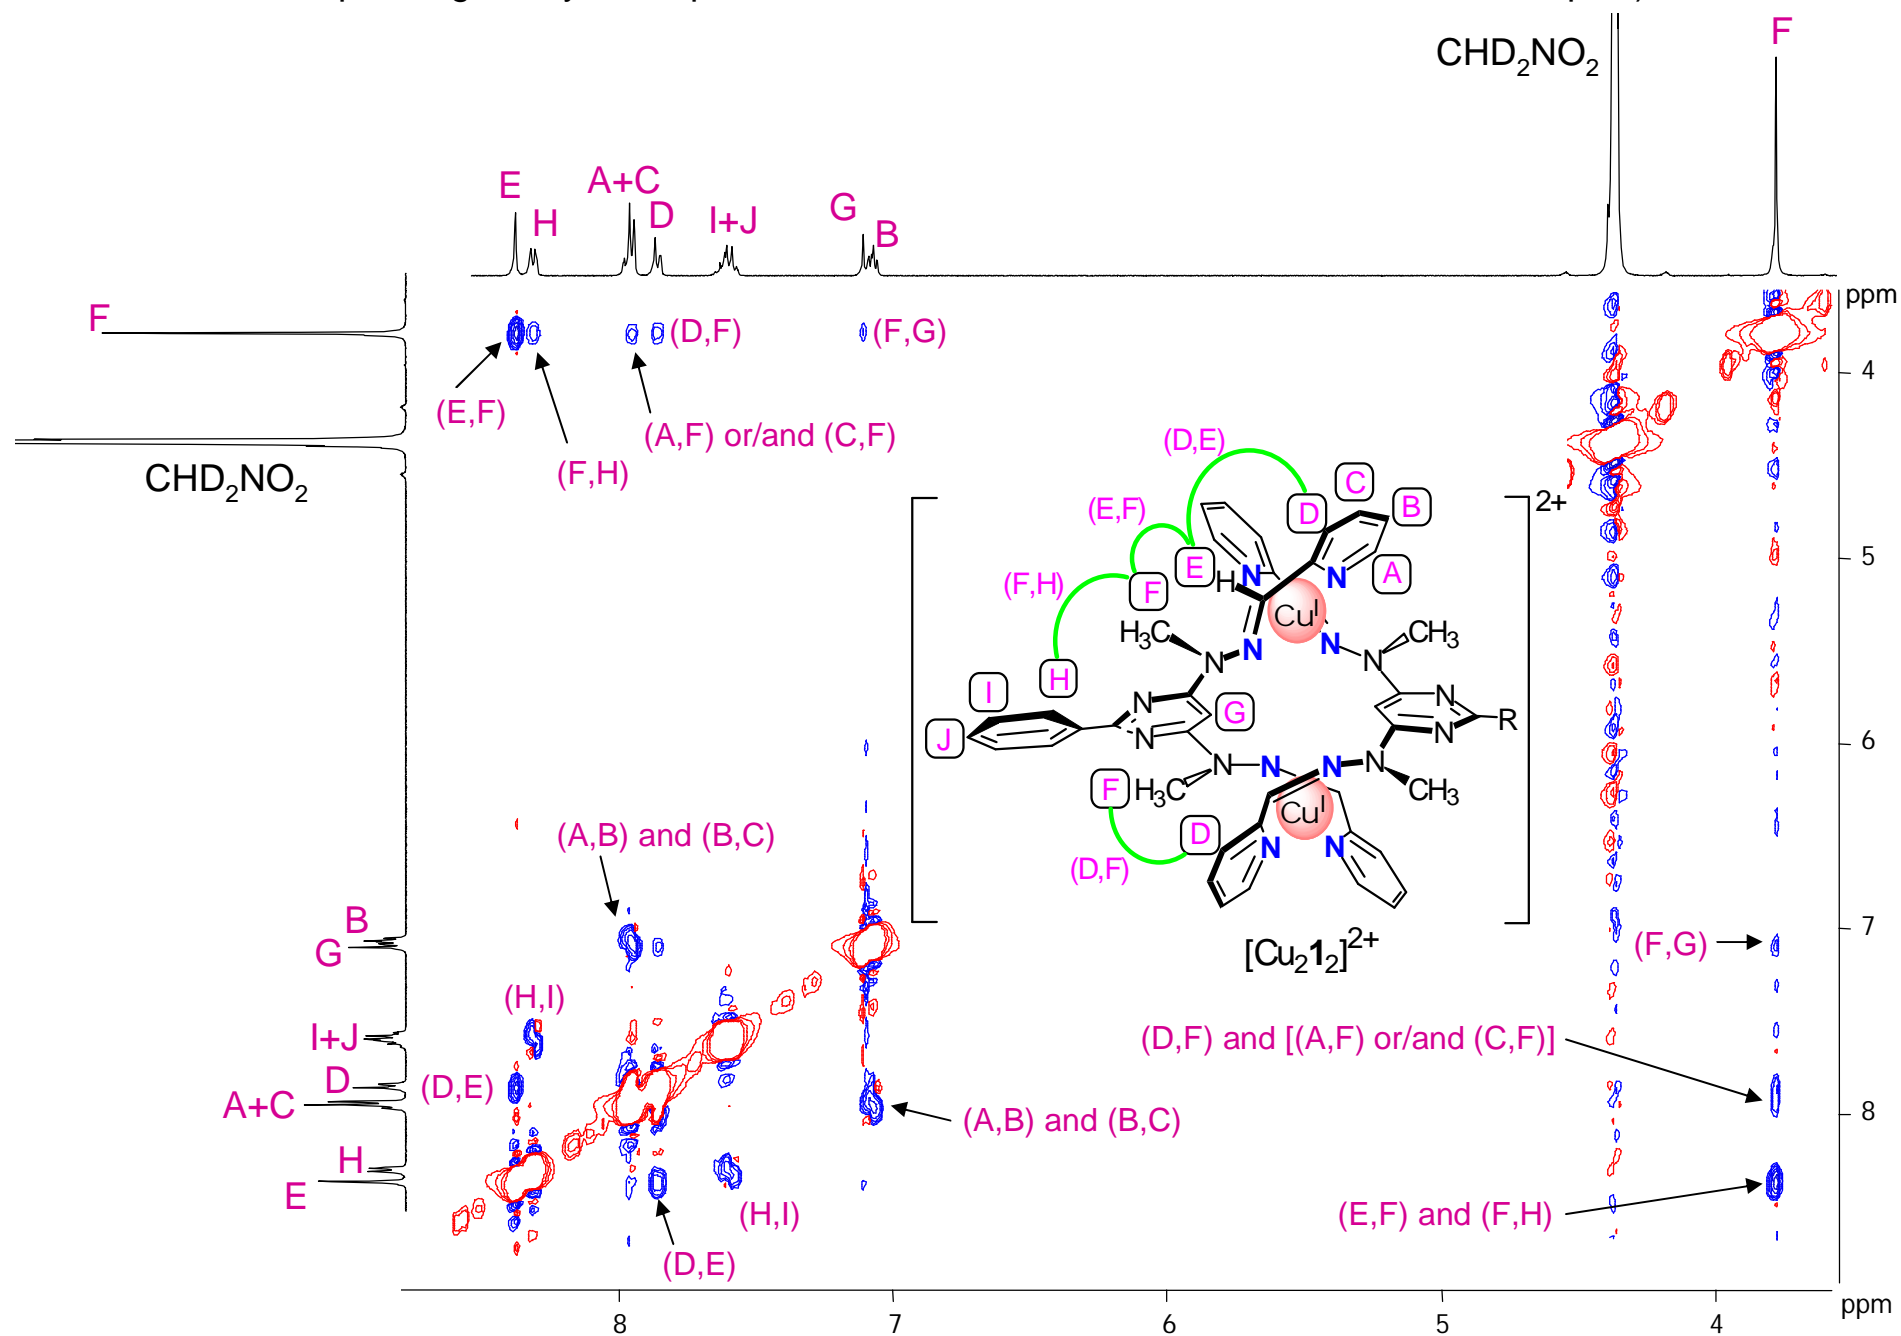

**Figure S2.**  $^{13}\text{C}$  NMR spectrum of complex  $[\text{Cu}_2\mathbf{1}_2](\text{CF}_3\text{SO}_3)_2$  (100 MHz,  $\text{CD}_3\text{NO}_2/\text{CD}_3\text{CN}$  10/0.9 v/v)

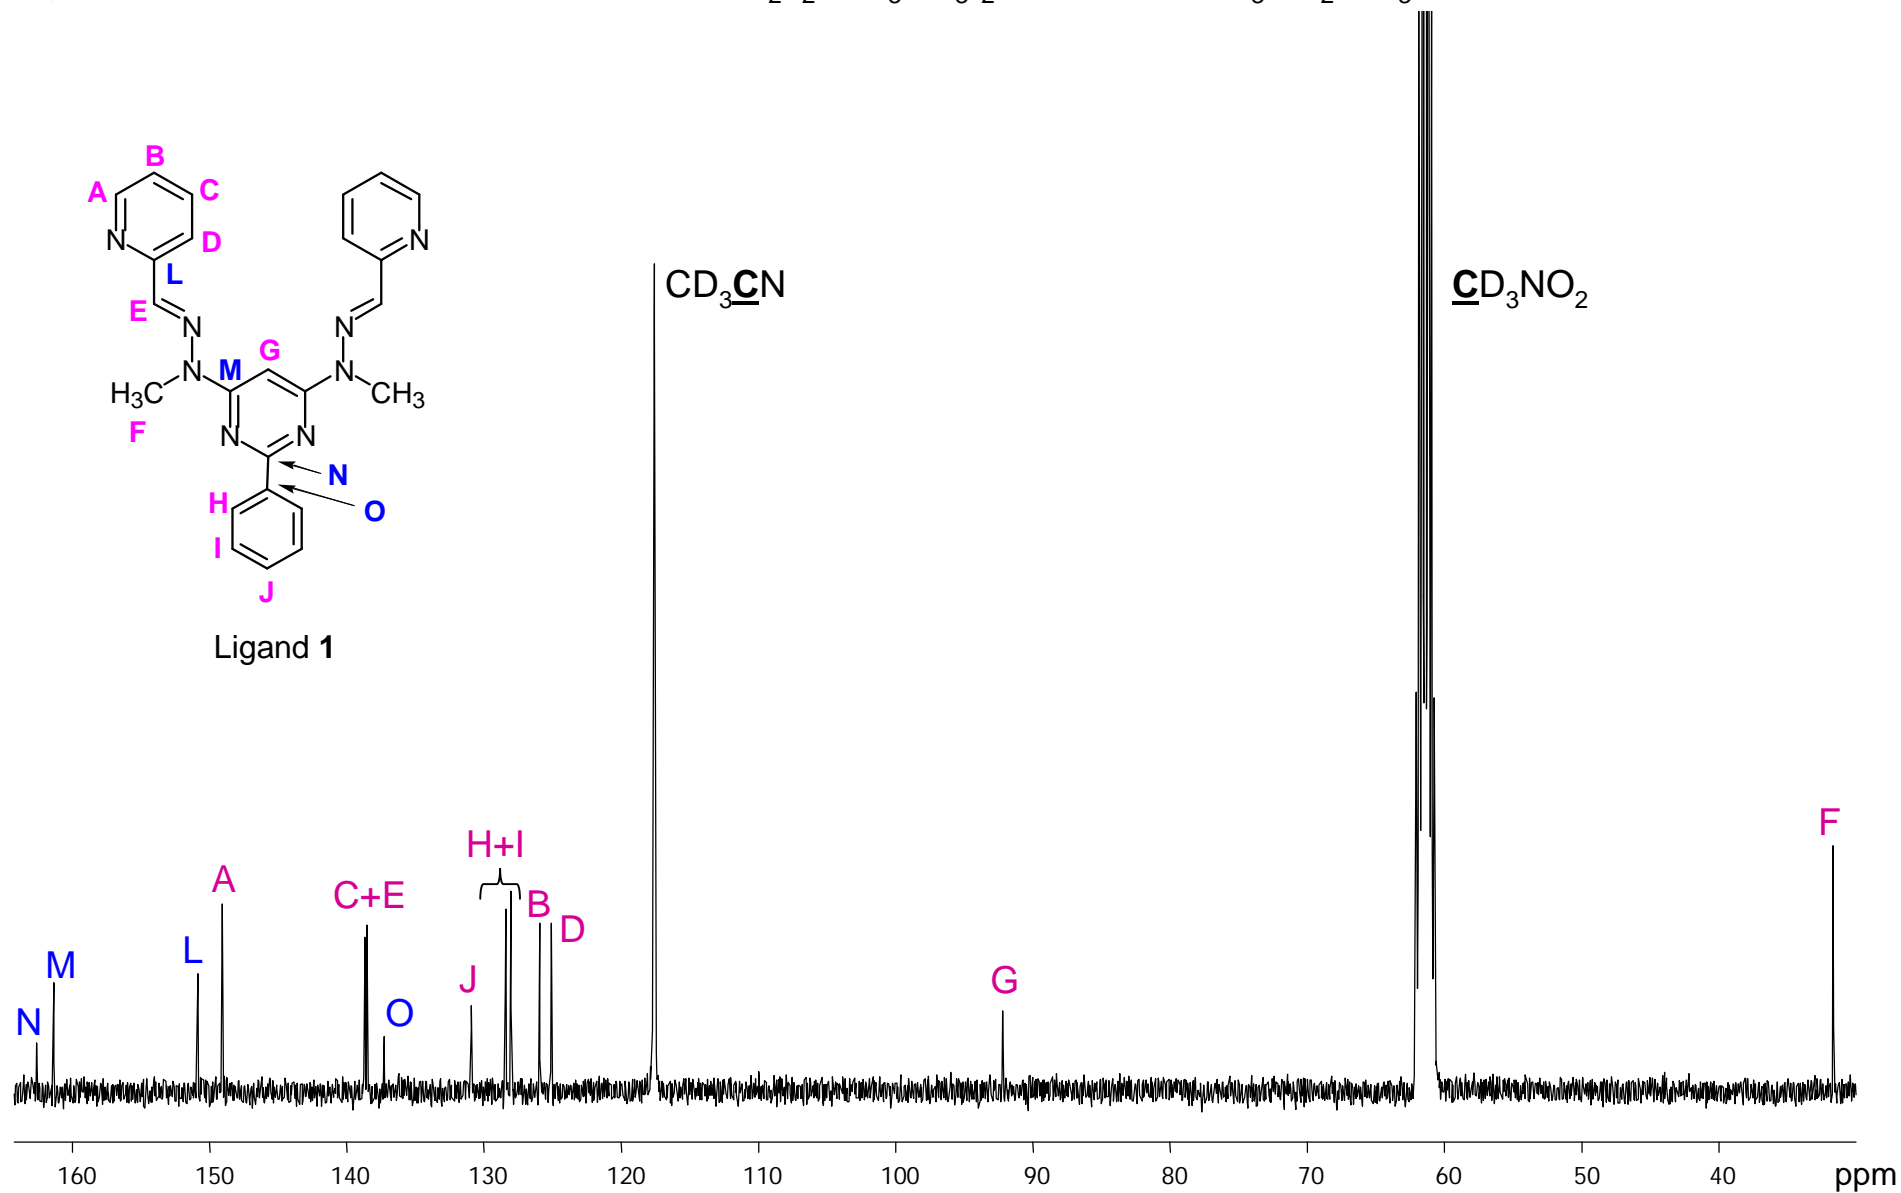

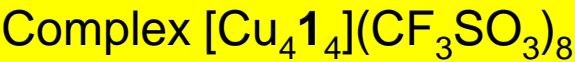

**Synthesis.** The solution of complex  $[\text{Cu}_4\mathbf{1}_4](\text{CF}_3\text{SO}_3)_8$  was obtained by mixing a suspension made of ligand **1** (2.11 mg, 0.005 mmol) and 0.5 mL of  $\text{CD}_3\text{NO}_2$  with 1 equivalent of  $\text{Cu}(\text{CF}_3\text{SO}_3)_2$ . The mixture was stirred for 10 min at r.t. The solution was brown.

**HR-ESI-MS**,  $m/z$ :  $[\text{Cu}_4\mathbf{1}_4(\text{CF}_3\text{SO}_3)_6]^{2+} = \text{C}_{102}\text{H}_{88}\text{Cu}_4\text{F}_{18}\text{N}_{32}\text{O}_{18}\text{S}_6^{2+}$ , found 1419.108 (100%), calcd. 1419.108 (the sample for ESI-MS was prepared using  $\text{CH}_3\text{NO}_2$  as a solvent).

**Crystallization.** Single crystals of  $[\text{Cu}_4\mathbf{1}_4](\text{CF}_3\text{SO}_3)_8$  suitable for X-ray diffraction were obtained by vapor diffusion of diethyl ether (non solvent) into the nitromethane solution of the complex, as follows: the nitromethane solution was placed in a small glass vial equipped with a cap with a small hole; this vial was placed inside a bigger vial with the appropriate amount of ether, and the bigger vial was sealed with a cap.

Attempts to grow crystals of  $[\text{Cu}_2\mathbf{1}_2](\text{CF}_3\text{SO}_3)_2$  following the above procedure with chloroform as a non solvent resulted in crystals of  $[\text{Cu}_4\mathbf{1}_4](\text{CF}_3\text{SO}_3)_8$ .

**Crystal data:**

|                                             |                                                                                                                                                                                                      |
|---------------------------------------------|------------------------------------------------------------------------------------------------------------------------------------------------------------------------------------------------------|
| Chemical formula                            | $\text{C}_{109}\text{H}_{103}\text{Cu}_4\text{F}_{24}\text{N}_{37}\text{O}_{34}\text{S}_8 = (\text{C}_{24}\text{H}_{22}\text{N}_8)_4\text{Cu}_4(\text{CF}_3\text{SO}_3)_8(\text{CH}_3\text{NO}_2)_5$ |
| $M/\text{g mol}^{-1}$                       | 3441.92                                                                                                                                                                                              |
| Crystal system                              | Monoclinic                                                                                                                                                                                           |
| Space group                                 | C c                                                                                                                                                                                                  |
| $a/\text{\AA}$                              | 17.5751(10)                                                                                                                                                                                          |
| $b/\text{\AA}$                              | 44.611(3)                                                                                                                                                                                            |
| $c/\text{\AA}$                              | 19.3360(12)                                                                                                                                                                                          |
| $\alpha/^\circ$                             | 90                                                                                                                                                                                                   |
| $\beta/^\circ$                              | 111.0630(10)                                                                                                                                                                                         |
| $\gamma/^\circ$                             | 90                                                                                                                                                                                                   |
| $V/\text{\AA}^3$                            | 14147.2(14)                                                                                                                                                                                          |
| Z                                           | 4                                                                                                                                                                                                    |
| $D_{\text{calcd.}}/\text{g cm}^{-3}$        | 1.616                                                                                                                                                                                                |
| $\lambda/\text{\AA}$                        | 0.71073 (Mo-K $\alpha$ )                                                                                                                                                                             |
| $\mu/\text{mm}^{-1}$                        | 0.830                                                                                                                                                                                                |
| $F(000)$                                    | 6992                                                                                                                                                                                                 |
| $T/\text{K}$                                | 173(2)                                                                                                                                                                                               |
| Flack parameter                             | 0.363(12)                                                                                                                                                                                            |
| R                                           | 0.0920                                                                                                                                                                                               |
| $wR_2$                                      | 0.2745                                                                                                                                                                                               |
| GOF                                         | 1.004                                                                                                                                                                                                |
| $\Delta\rho_{\text{min}}/\text{e \AA}^{-3}$ | -1.697                                                                                                                                                                                               |
| $\Delta\rho_{\text{max}}/\text{e \AA}^{-3}$ | 1.809                                                                                                                                                                                                |
| CCDC #                                      | 904938                                                                                                                                                                                               |
